# Supplementary material
Source: HighWire-hosted journal article supplement (https://www.cmaj.ca/highwire/filestream/58202/field_highwire_adjunct_files/0/ana-brother-1-at.pdf)
Supplement: ana-brother-1-at.pdf [file ana-brother-1-at.pdf]

**Appendix 1:** Summary of rates of anaphylaxis following immunization (by surveillance system type and vaccine)

| Author                                     | Year         | Country                    | Target population                                                                     | AEFI assessment                                                                                                                                                                                                                        | Anaphylaxis definition                                                                                                                                                                                                                                                                                                                                                           | Vaccine                    | No. of events | Doses     | Administered or distributed? | Anaphylaxis rate per 100 000 | 95% Poisson CI |
|--------------------------------------------|--------------|----------------------------|---------------------------------------------------------------------------------------|----------------------------------------------------------------------------------------------------------------------------------------------------------------------------------------------------------------------------------------|----------------------------------------------------------------------------------------------------------------------------------------------------------------------------------------------------------------------------------------------------------------------------------------------------------------------------------------------------------------------------------|----------------------------|---------------|-----------|------------------------------|------------------------------|----------------|
| <b>School-based programs</b>               |              |                            |                                                                                       |                                                                                                                                                                                                                                        |                                                                                                                                                                                                                                                                                                                                                                                  |                            |               |           |                              |                              |                |
| New South Wales                            | Apr–Dec 2007 | New South Wales, Australia | 15–18 years                                                                           | • School-based and routine provider-based passive surveillance                                                                                                                                                                         | • Brighton classification <sup>1</sup>                                                                                                                                                                                                                                                                                                                                           | Quadrivalent HPV           | 7             | 269 680   | Administered                 | 2.6                          | 1.0–5.3        |
| D'Souza et al. <sup>2</sup>                | Aug–Nov 1998 | Australia                  | Males and females 5–12 years                                                          | • School-based and routine provider-based passive surveillance                                                                                                                                                                         | • Anaphylactoid: exaggerated allergic reaction occurring within 2 hours of immunization characterized by 1 or more of wheezing and shortness of breath due to bronchospasm; laryngospasm/laryngeal edema; or skin manifestations<br>• Anaphylaxis: circulatory failure occurring within minutes of immunization with or without bronchospasm and/or laryngospasm/laryngeal edema | MMR                        | 7             | 1 700 000 | Administered                 | 0.4                          | 0.2–0.8        |
| NSW Department of Health, unpublished data | 2003         | New South Wales, Australia | Males and females 5–19 years                                                          | • School-based and routine provider-based passive surveillance                                                                                                                                                                         | • As per <i>The Australian Immunisation Handbook</i> <sup>3</sup>                                                                                                                                                                                                                                                                                                                | Conjugated meningococcal C | 1             | 823 197   | Administered                 | 0.1                          | 0.003–0.68     |
| Dobson et al. <sup>4</sup>                 | 1992         | British Columbia, Canada   | Males and females 10–12 years                                                         | • School-based passive surveillance plus active surveillance of pediatricians using mailed cards after each dose and telephone contact                                                                                                 | • Not given                                                                                                                                                                                                                                                                                                                                                                      | Hepatitis B                | 1             | 127 922   | Administered                 | 0.8                          | 0.02–4.36      |
| UK Department of Health <sup>5</sup>       | 1994         | United Kingdom             | Routine childhood vaccination plus targeted campaign 7.17 million children 5–16 years | • School-based and routine provider-based passive surveillance<br>• High priority handling of MR vaccines reports<br>• Daily electronic transfer to program database<br>• Active seeking of follow-up if “Yellow Card” info inadequate | • Not given<br>• 123 reports of immediate allergic type reactions allergy or anaphylaxis within 24 hours (1.5 per 100 000)                                                                                                                                                                                                                                                       | Measles–rubella            | 80*           | 8 000 000 | Administered                 | 1.0                          | 0.8–1.2        |

Continued

| Enhanced surveillance systems |                   |               |                                                                                                                                                                                                                            |                                                                                                                                                                                                                                                                                                                                                                                                                                                                                                  |                                                                                                                                                                                                                                                                                                                                                                                                                                                                                                        |                               |    |           |              |      |             |
|-------------------------------|-------------------|---------------|----------------------------------------------------------------------------------------------------------------------------------------------------------------------------------------------------------------------------|--------------------------------------------------------------------------------------------------------------------------------------------------------------------------------------------------------------------------------------------------------------------------------------------------------------------------------------------------------------------------------------------------------------------------------------------------------------------------------------------------|--------------------------------------------------------------------------------------------------------------------------------------------------------------------------------------------------------------------------------------------------------------------------------------------------------------------------------------------------------------------------------------------------------------------------------------------------------------------------------------------------------|-------------------------------|----|-----------|--------------|------|-------------|
| Sakaguchi et al. <sup>5</sup> | Apr 1994–Mar 1997 | Japan         | Measles: males and females aged 1 year. Other vaccines during infancy after measles.                                                                                                                                       | <ul style="list-style-type: none"> <li>Physicians and vaccine manufacturers submitted clinical data and serum samples from children with systemic immediate hypersensitivity reactions to live virus vaccines containing gelatin</li> <li>Submitted in order to access anti-gelatin IgE testing</li> </ul>                                                                                                                                                                                       | <ul style="list-style-type: none"> <li>Within 1 hour of vaccination</li> <li>Severe: cutaneous signs plus airway obstruction or anaphylactic shock</li> <li>Mild: cutaneous signs plus respiratory symptoms (wheezing and/or cough or laryngeal edema) without airway obstruction</li> </ul>                                                                                                                                                                                                           | Measles                       | 59 | 3 507 090 | Distributed  | 1.7  | 1.3–2.2     |
|                               |                   |               |                                                                                                                                                                                                                            |                                                                                                                                                                                                                                                                                                                                                                                                                                                                                                  |                                                                                                                                                                                                                                                                                                                                                                                                                                                                                                        | Mumps                         | 9  | 458 828   | Distributed  | 2.0  | 0.9–3.7     |
|                               |                   |               |                                                                                                                                                                                                                            |                                                                                                                                                                                                                                                                                                                                                                                                                                                                                                  |                                                                                                                                                                                                                                                                                                                                                                                                                                                                                                        | Rubella                       | 24 | 1 503 838 | Distributed  | 1.6  | 1.0–2.4     |
|                               |                   |               |                                                                                                                                                                                                                            |                                                                                                                                                                                                                                                                                                                                                                                                                                                                                                  |                                                                                                                                                                                                                                                                                                                                                                                                                                                                                                        | Varicella                     | 16 | 679 513   | Distributed  | 2.4  | 1.3–3.8     |
|                               |                   |               |                                                                                                                                                                                                                            |                                                                                                                                                                                                                                                                                                                                                                                                                                                                                                  |                                                                                                                                                                                                                                                                                                                                                                                                                                                                                                        | Varicella 1996 (peak rate)    | 12 | 265 594   | Distributed  | 4.5  | 2.3–7.9     |
| Patja et al. <sup>7,8</sup>   | 1982–1996         | Finland       | Males and females 14 months and 6 years, plus catch-up initially. In 1988, 11–13 year old girls, health care workers, nursing students. New mothers 1988–1993. Defence personnel 1986. 1.8 million individuals vaccinated. | <ul style="list-style-type: none"> <li>Passive surveillance through health care providers</li> <li>Prospective follow-up of notified serious adverse events</li> </ul>                                                                                                                                                                                                                                                                                                                           | <ul style="list-style-type: none"> <li>Not defined</li> <li>Of 30 suspected cases notified, in 15 cases the physician ultimately diagnosed fainting</li> </ul>                                                                                                                                                                                                                                                                                                                                         | MMR                           | 15 | 2 990 000 | Administered | 0.05 | 0.028–0.082 |
| Bohlke et al. <sup>9</sup>    | 1991–1997         | United States | 2 226 907 males and females aged 0–17 years enrolled in 1 of 4 US Health Maintenance Organizations                                                                                                                         | <ul style="list-style-type: none"> <li>Vaccine Safety Datalink Project</li> <li>Automated linkage of immunization records with medical records from hospitalizations, emergency department visits and some outpatient visits containing ICD-9 codes suggestive of anaphylaxis</li> <li>Reviewed diagnoses of interest for 657/664 identified as occurring within 0–2 days of vaccination including chart review of other possible ICD-9 codes of interest (allergy related) at 1 site</li> </ul> | <ul style="list-style-type: none"> <li>Probable anaphylaxis: manifestations involving &gt;1 organ system (cutaneous, respiratory, cardiovascular, gastrointestinal) occurring within 4 hours of exposure to precipitant with subsequent treatment</li> <li>Possible anaphylaxis: (1) as for probable but untreated; or (2) involvement of &gt;1 organ system occurring after 4 hours or indeterminate time period, treated; or (3) only 1 system involved, symptoms within 4 hours, treated</li> </ul> | All vaccines, all study sites | 5  | 7 644 049 | Administered | 0.1  | 0.021–0.153 |
|                               |                   |               |                                                                                                                                                                                                                            |                                                                                                                                                                                                                                                                                                                                                                                                                                                                                                  |                                                                                                                                                                                                                                                                                                                                                                                                                                                                                                        | All vaccines, enhanced site   | 1  | 653 990   | Administered | 0.2  | 0.004–0.852 |

Continued

| Passive national surveillance systems |           |                |                            |                                                                                                                              |                                                                                                                                                                                                                                                                                                                                                                                                                                                                                                          |                       |     |               |             |      |             |
|---------------------------------------|-----------|----------------|----------------------------|------------------------------------------------------------------------------------------------------------------------------|----------------------------------------------------------------------------------------------------------------------------------------------------------------------------------------------------------------------------------------------------------------------------------------------------------------------------------------------------------------------------------------------------------------------------------------------------------------------------------------------------------|-----------------------|-----|---------------|-------------|------|-------------|
| Nakayama and Onoda <sup>10</sup>      | 1994–2004 | Japan          | Male and female population | <ul style="list-style-type: none"> <li>• Passive national surveillance from physicians</li> </ul>                            | <ul style="list-style-type: none"> <li>• Urticaria or angioedema with respiratory symptoms, cardiovascular shock or both</li> </ul>                                                                                                                                                                                                                                                                                                                                                                      | Japanese encephalitis | 6   | 9 450 000     | Distributed | 0.1  | 0.02–0.14   |
|                                       |           |                |                            |                                                                                                                              |                                                                                                                                                                                                                                                                                                                                                                                                                                                                                                          | DTPa                  | 10  | 10 560 000    | Distributed | 0.1  | 0.05–0.17   |
|                                       |           |                |                            |                                                                                                                              |                                                                                                                                                                                                                                                                                                                                                                                                                                                                                                          | Influenza             | 26  | 38 020 000    | Distributed | 0.1  | 0.04–0.10   |
| Pool et al. <sup>11</sup>             | 1991–1997 | United States  | Male and female population | <ul style="list-style-type: none"> <li>• VAERS – passive national surveillance</li> <li>• Reports from any source</li> </ul> | <ul style="list-style-type: none"> <li>• Probable anaphylaxis: evidence of a mast-cell mediated reaction including at least 1 dermatological sign or symptom and 1 or more specified signs and symptoms from respiratory, cardiovascular or gastrointestinal systems within 4 hours</li> <li>• Possible anaphylaxis: respiratory or dermatologic symptoms but not both within 4 hours of immunization OR 1 or both respiratory and dermatological symptoms but &gt; 4 hours post immunization</li> </ul> | MMR                   | 168 | 94 000 000    | Distributed | 0.2  | 0.15–0.21   |
| UK Department of Health <sup>12</sup> | 1997–2003 | United Kingdom | Male and female population | <ul style="list-style-type: none"> <li>• Passive surveillance “Yellow Cards”</li> </ul>                                      | <ul style="list-style-type: none"> <li>• As per the Green Book<sup>12</sup></li> </ul>                                                                                                                                                                                                                                                                                                                                                                                                                   | All vaccines          | 130 | 117 000 000   | Distributed | 0.1  | 0.09–0.13   |
| Zhou et al. <sup>13</sup>             | 1991–2001 | United States  | Male and female population | <ul style="list-style-type: none"> <li>• VAERS – passive national surveillance</li> <li>• Reports from any source</li> </ul> | <ul style="list-style-type: none"> <li>• As per VAERS classification system (COSTART) “anaphylactoid”</li> </ul>                                                                                                                                                                                                                                                                                                                                                                                         | All vaccines          | 452 | 1 900 000 000 | Distributed | 0.02 | 0.022–0.026 |
| Kelso et al. <sup>14</sup>            | 1990–1997 | United States  | Male and female population | <ul style="list-style-type: none"> <li>• VAERS – passive national surveillance</li> <li>• Reports from any source</li> </ul> | <ul style="list-style-type: none"> <li>• All yellow fever reports reviewed (n=243), 40 possible or probable anaphylaxis</li> <li>• Probable: within 4 hours of vaccination and with both dermatological and respiratory signs/symptoms</li> <li>• Possible: either dermatological or respiratory symptoms within 4 hours or both occurring later than 4 hours</li> </ul>                                                                                                                                 | Yellow fever          | 40  | 5 236 820     | Distributed | 0.8  | 0.5–1.0     |

Note: AEFI = adverse events following immunization, DTPa = diphtheria–tetanus–pertussis (acellular), MMR = measles–mumps–rubella, VAERS = Vaccine Adverse Event Reporting System.  
 \* Not given in the publication. We calculated this from published denominator and anaphylaxis rate.

## References

1. Rüggeberg JU, Gold MS, Bayas JM, et al. The Brighton Collaboration Anaphylaxis Working Group. Anaphylaxis: case definition and guidelines for data collection, analysis, and presentation of immunization safety data. *Vaccine* 2007;25:5675-84.
2. D'Souza RM, Campbell-Lloyd S, Isaacs D, et al. Adverse events following immunisation associated with the 1998 Australian Measles Control Campaign. *Commun Dis Intell* 2000;24:27-33.
3. National Health and Medical Research Council. The Australian immunisation handbook. 8th ed. Canberra: Australian Government Department of Health and Ageing; 2003.
4. Dobson S, Scheifele D, Bell A. Assessment of a universal, school-based hepatitis B vaccination program. *JAMA* 1995;274:1209-13.

5. Salisbury DM, Campbell H, Edwards B. Health Promotional Division & Medicines Control Agency, ed. Measles rubella immunisation campaign in England "one year on". London, UK: Department of Health; 1995.
6. Sakaguchi M, Nakayama T, Fujita H, Toda M, Inouye S. Minimum estimated incidence in Japan of anaphylaxis to live virus vaccines including gelatin. *Vaccine* 2000;19:431-6.
7. Patja A, Davidkin I, Kurki T, et al. Serious adverse events after measles-mumps-rubella vaccination during a fourteen-year prospective follow-up. *Pediatr Infect Dis J* 2000;19:1127-34.
8. Patja A, Mäkinen-Kiljunen S, Davidkin I, Paunio M, Peltola H. Allergic reactions to measles-mumps-rubella vaccination. *Pediatrics* 2001;107:e27.
9. Bohlke K, Davis RL, Marcy SM, et al. Risk of anaphylaxis after vaccination of children and adolescents. *Pediatrics* 2003;112:815-20.
10. Nakayama T, Onoda K. Vaccine adverse events reported in post-marketing study of the Kitasato Institute from 1994 to 2004. *Vaccine* 2007;25:570-6.
11. Pool V, Braun MM, Kelso JM, et al. Prevalence of anti-gelatin IgE antibodies in people with anaphylaxis after measles-mumps rubella vaccine in the United States. *Pediatrics* 2002;110:e71.
12. Department of Health. Vaccine safety and the management of adverse events following immunisation. In: Salisbury D, Ramsay M, Noakes K, eds. Immunisation against infectious disease. *The Green Book*. London, UK: The Stationery Office; 2006: 53-64. Available: [www.dh.gov.uk/en/PublicHealth/HealthProtection/Immunisation/Greenbook/DH\\_4097254](http://www.dh.gov.uk/en/PublicHealth/HealthProtection/Immunisation/Greenbook/DH_4097254) (accessed 2008 May 23).
13. Zhou W, Pool V, Iskander JK, et al. Surveillance for safety after immunization: Vaccine Adverse Event Reporting System (VAERS) - United States, 1991-2001. [erratum appears in *MMWR Morb Mortal Wkly Rep*. 2003 Feb 14;52(06):113]. *MMWR Surveill Summ* 2003;52:1-24.
14. Kelso JM, Mootrey GT, Tsai TF. Anaphylaxis from yellow fever vaccine. *J Allergy Clin Immunol* 1999;103:698-701.
